# Supplementary material
Source: PubMed Central journal article supplement (PMC5639729)
Supplement: NIHMS868068-supplement-SI.pdf [file NIHMS868068-supplement-SI.pdf]

# ADVANCED FUNCTIONAL MATERIALS

## Supporting Information

for *Adv. Funct. Mater.*, DOI: 10.1002/adfm.201600713

### Design of Strain-Limiting Substrate Materials for Stretchable and Flexible Electronics

*Yinji Ma, Kyung-In Jang, Liang Wang, Han Na Jung, Jean Won Kwak, Yeguang Xue, Hang Chen, Yiyuan Yang, Dawei Shi, Xue Feng, John A. Rogers,\* and Yonggang Huang\**

## Supporting Information

### Design of mechanically strain-limiting substrates for stretchable and flexible electronics

*Yinji Ma<sup>†</sup>, Kyung-In Jang<sup>†</sup>, Liang Wang, Han Na Jung, Jean Won Kwak, Yeguang Xue, Hang Chen, Yiyuan Yang, Dawei Shi, Xue Feng, John A. Rogers<sup>\*</sup>, and Yonggang Huang<sup>\*</sup>*

#### Supplementary Note 1. Maximum pre-strain for the substrate with finite thickness

For a thick substrate, the strain in the film reaches a maximum when the substrate is released from the pre-strained length  $L_2$  to the initial length  $L_1$ . This shrinkage, corresponding to  $\varepsilon_{pre} = (L_2 - L_1)/L_1$ , is imposed on the film. For a relatively thin substrate, the substrate only shrinks to  $L_0$ , and therefore the shrinkage of the film corresponds to  $\varepsilon_{transition} = (L_2 - L_0)/L_0$ . Therefore,  $\varepsilon_{pre}$  in Eq. (1) should be replaced by  $\varepsilon_{transition}$  for a substrate with finite thickness in order to avoid plastic yielding, i.e.,  $\varepsilon_{transition} < \varepsilon_Y^2/(4\varepsilon_c)$ . Together with Eq. (3) this gives the maximum pre-strain for a substrate with finite thickness

$$\varepsilon_{pre} < \frac{\varepsilon_Y^2}{4\varepsilon_c} + \frac{1}{4} \left( \frac{9\bar{E}_f h^3}{\bar{E}_s H^3} \right)^{1/3} \left( \frac{\varepsilon_Y^2}{4\varepsilon_c} + 1 \right). \quad (S1)$$

#### Supplementary Note 2. Local wrinkling versus global buckling

The critical length  $L_{cr}$  that separates local wrinkling from global buckling is given by [20]

$$L_{cr} = 4\pi \sqrt{EI \left( \frac{\left( \bar{E}_f / 3\bar{E}_s \right)^{2/3}}{\bar{E}_s H + \bar{E}_f h} - \frac{1.2}{\bar{E}_s (H + h)} \right)}, \quad (S2)$$

where the effective bending rigidity  $EI$  is

$$EI = \frac{\left(\bar{E}_s H^2 + \bar{E}_f h^2\right)^2 + 4\bar{E}_s H \bar{E}_f h (H + h)^2}{12(\bar{E}_s H + \bar{E}_f h)}. \quad (\text{S3})$$

For  $H \gg h$ , Eqs. (S2) and (S3) degenerate to Eqs. (5) and (6), respectively. For a substrate thickness reduced to a critical value,  $L_{cr}$  reaches zero, corresponding to global buckling at all lengths of the film. This critical value is given by  $\left(\bar{E}_s/\bar{E}_f\right)^{2/3} + \left[\bar{E}_f h^3/(\bar{E}_s H^3)\right]^{1/3} = 0.064^{1/3}$ .

For  $\bar{E}_s/\bar{E}_f \ll 1$ , it becomes  $\bar{E}_f h^3/(\bar{E}_s H^3) = 0.064$ .

### Supplementary Note 3. Effect of delamination

Figure S4a shows a model of interfacial delamination between a 1 $\mu\text{m}$ -thick PI film and a 1mm-thick Silbione substrate with 36.0% unidirectional pre-strain. The length of the crack (interfacial delamination) is 195 $\mu\text{m}$ , which is about half of the buckling wavelength  $\lambda=390\mu\text{m}$  for the system of materials without a crack. A crack is placed at the peak of each wrinkle (Fig. S4a) where the strain reaches the maximum for the system of materials without delamination. Stress-strain curves with and without the crack, obtained by FEA, are very close, which confirms that the effect of delamination on the stress-strain curve is small.

### SI figure captions

**Figure S1.** Normalized length  $L_0/L_1$  versus thickness ratio  $H/h$  for the PI film on several substrates.

**Figure S2.** Numerical results of morphologies (scale bar, 1mm) for 1 $\mu$ m-thick PI film on 1mm-thick Silbione substrate subjected to **a)** 15.1%, **b)** 25.6% and **c)** 36.0% pre-strains.

**Figure S3. a)** Interfacial delamination morphologies of 1 $\mu$ m-thick PI film on 1mm-thick Silbione substrate subjected to 36.0% pre-strain (crack length:  $a$ ,  $a/\lambda = 0.5$ ). **b)** Comparison of stress-strain curves for cases with and without delamination.

**Figure S4.** Stress-strain curves for  $x$ -, 30 $^\circ$ -, 45 $^\circ$ -, 60 $^\circ$ -, and  $y$ -stretching of a 1 $\mu$ m-thick PI mesh (width  $W = 0.1$ mm and spacing  $S = 0.4$ mm) on 1mm-thick Silbione substrate subjected to pre-strains of  $\varepsilon_{pre}^x = 30.8\%$  and  $\varepsilon_{pre}^y = 15.7\%$ .

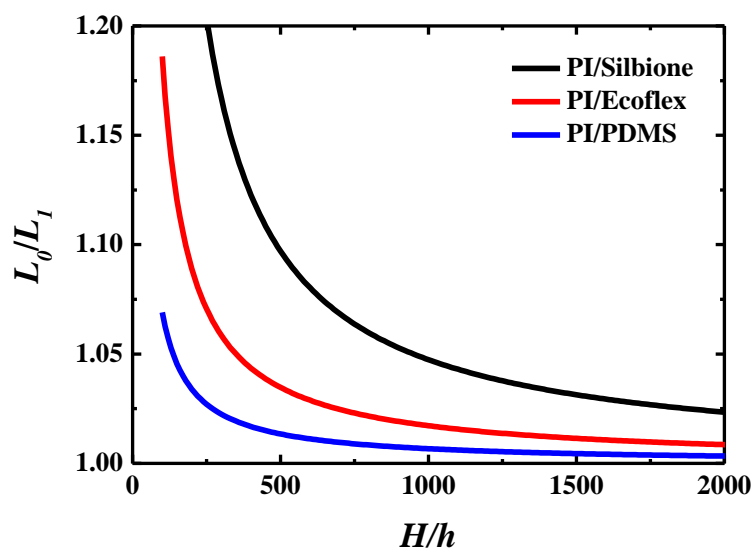

Figure S1

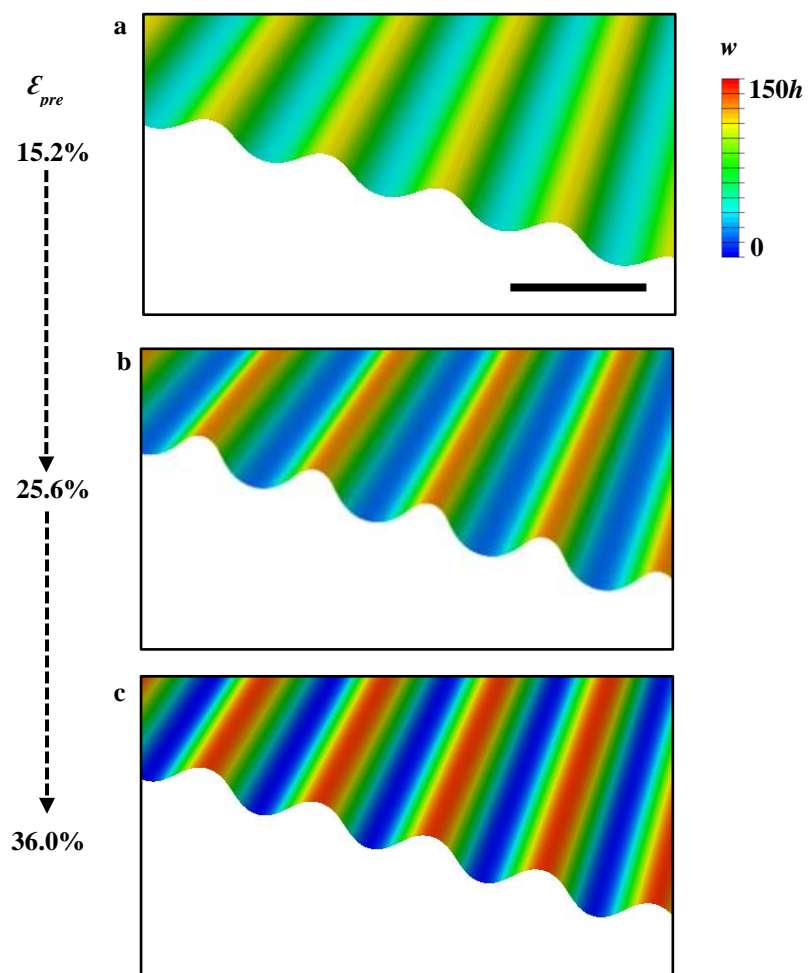

Figure S2

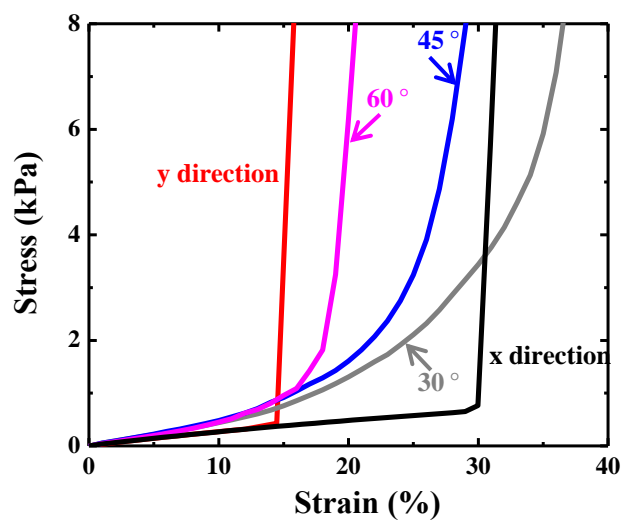

Figure S3

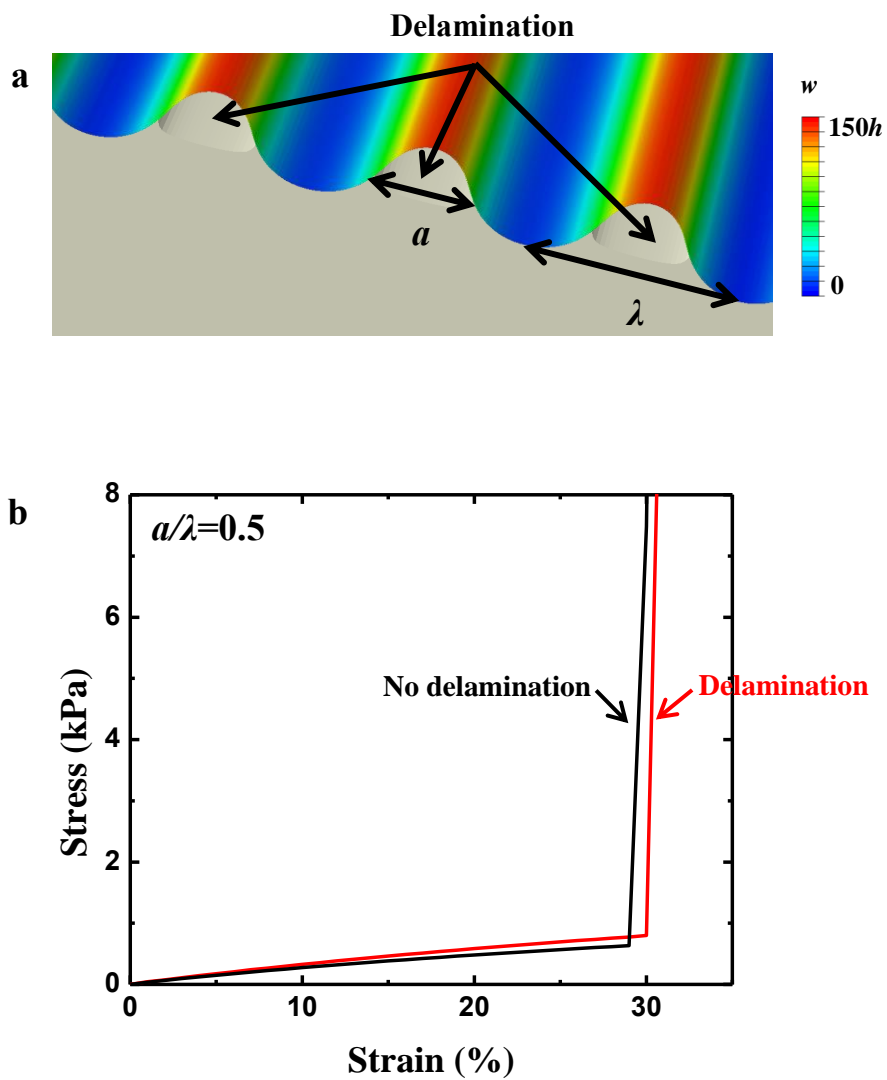

Figure S4
